# Supplementary material for: Mint3-mediated L1CAM expression in fibroblasts promotes cancer cell proliferation via integrin α5β1 and tumour growth
Source: PubMed Central journal article supplement (PMC5523060; doi:10.1038/oncsis.2017.27), 2017-05-15
Supplement: oncsis201727x1.pdf [file oncsis201727x1.pdf]

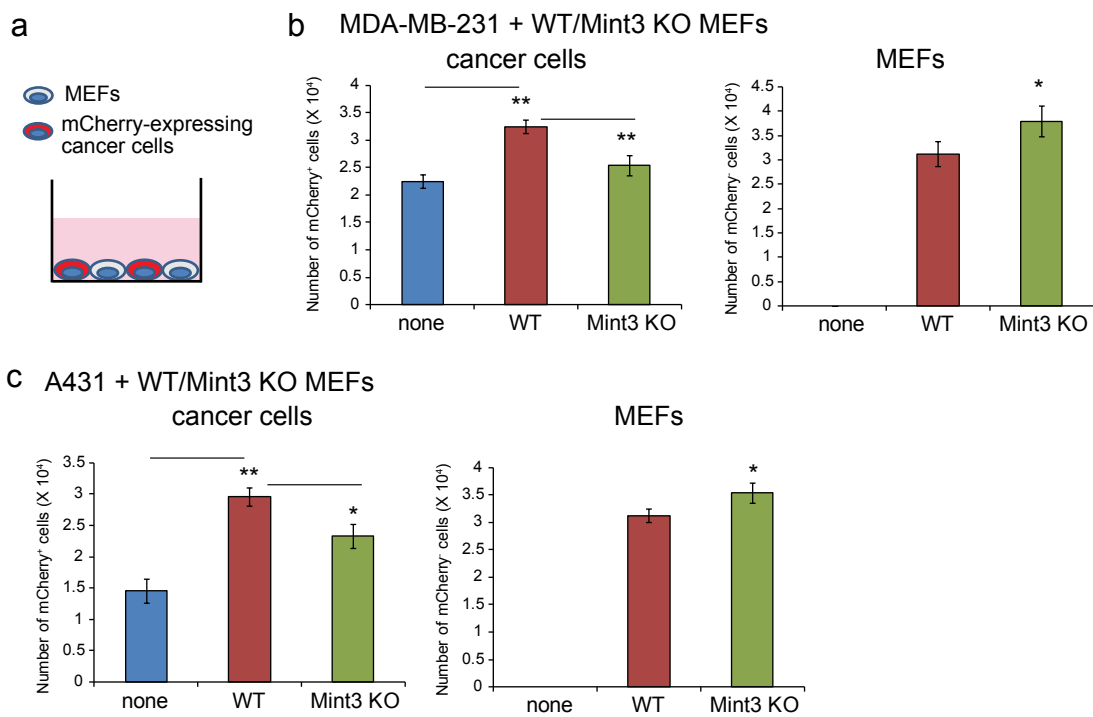

**Supplementary Figure 1. Mint3 KO MEFs defect in promoting cancer cell proliferation.**

(a) Illustration of co-culture experiments.

(b, c) mCherry-expressing MDA-MB-231 (b) and A431 cells (c) were co-cultured with MEFs for 48 h, and mCherry-positive cancer cells (left panel) and mCherry-negative MEFs (right panel) were counted.

In b and c, error bars indicate the s.d. (n = 3). The data were analysed using a t test. \*p < 0.05, \*\*p < 0.01. The data shown in b-d are representative of 3 independent experiments with similar results.

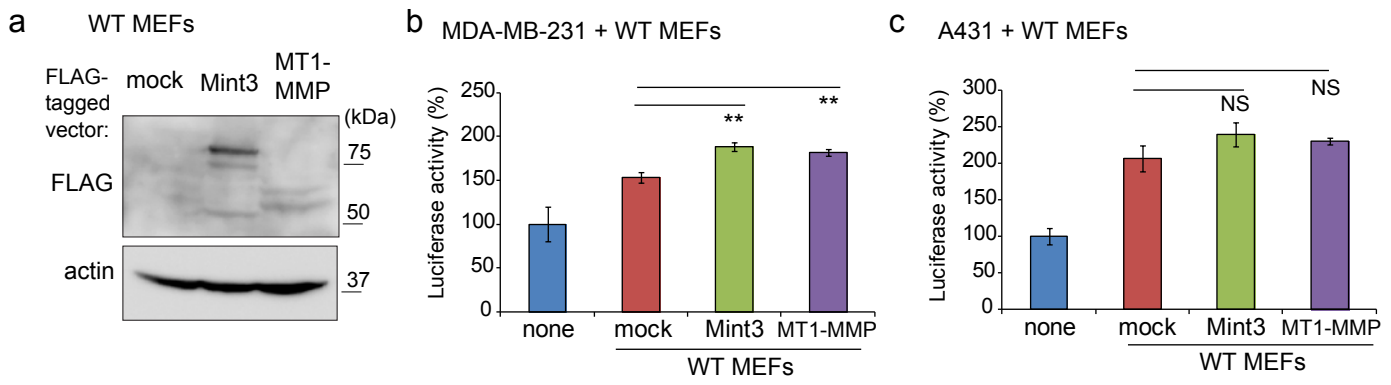

**Supplementary Figure 2. Exogenous expression of Mint3 and MT1-MMP in WT MEFs slightly promotes proliferation of MDA-MB-231 cells.**

(a) Western blot analysis of mock, FLAG-tagged Mint3, and FLAG-tagged MT1-MMP expression in WT MEFs.

(b, c) Secreted luciferase activity from GLuc-expressing MDA-MB-231 (b) and A431 cells (c) co-cultured with mock, Mint3, or MT1-MMP expressing WT MEFs.

In b and c, error bars indicate the s.d. (n = 3). The data were analysed using a t test. \*\*p < 0.01. NS, not significant.

The data shown in a-c are representative of 3 independent experiments with similar results.

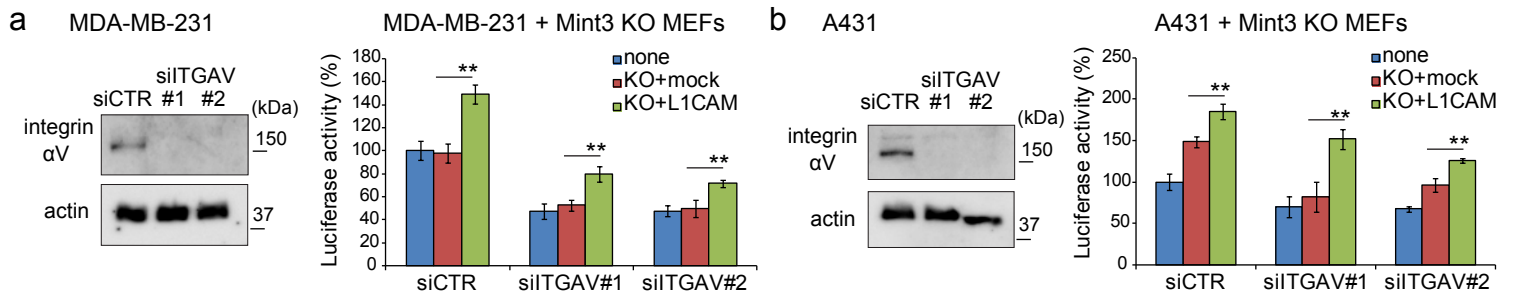

**Supplementary Figure 3. Knockdown of Integrin  $\alpha$ V in cancer cells does not affect MEF-mediated proliferation of MDA-MB-231 and A431 cells.**

(**a**, **b**) (left panel) Western blot analysis of integrin expression in MDA-MB-231 (**a**) and A431 cells (**b**) treated with control (CTR) or integrin  $\alpha$ V (ITGAV) siRNA. (right panel) Secreted luciferase activity from siRNA-transfected GLuc-expressing MDA-MB-231 (**a**) and A431 cells (**b**) co-cultured with mock or L1CAM expressing Mint3 KO MEFs.

In **a** and **b**, error bars indicate the s.d. ( $n = 3$ ). The data were analysed using a t test. \*\* $p < 0.01$ . NS, not significant.

The data are representative of 3 independent experiments with similar results.

**a** MDA-MB-231

**b** A431

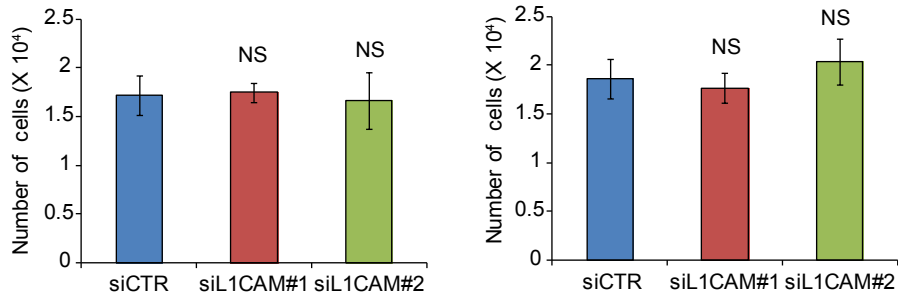

**Supplementary Figure 4. Knockdown of L1CAM does not affect proliferation of MDA-MB-231 and A431 cells.**

(a, b) Cell number of GLuc-expressing MDA-MB-231 (a), A431 cells (b) transfected with control (CTR) or L1CAM siRNA.

In a and b, error bars indicate the s.d. (n = 3). The data were analysed using a t test. NS, not significant.

The data are representative of 3 independent experiments with similar results.

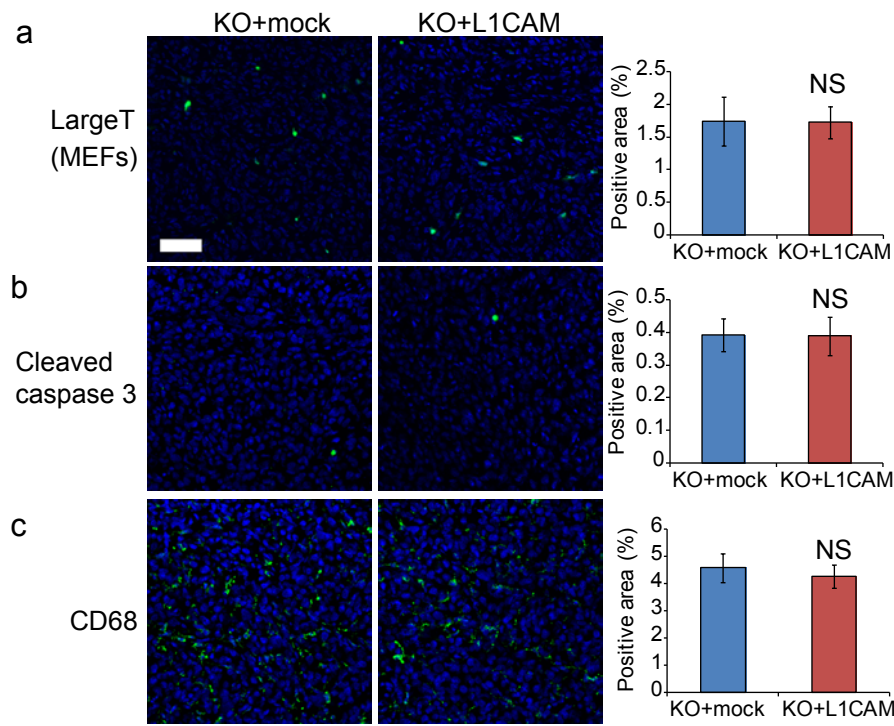

**Supplementary Figure 5. L1CAM expression in Mint3 KO MEFs does not affect the number of MEFs, apoptotic cells, and macrophages in tumour tissues of MDA-MB-231 cells co-cultured with MEFs.**

(a-c) Immunostaining of SV40 large T antigen (a), cleaved caspase 3 (b), and CD68 (c) in tumour tissues of MDA-MB-231 cells cultured with mock or L1CAM expressing Mint3 KO MEFs at day 10 (left panel). Bar = 50  $\mu$ m. Positive areas for each staining were analysed (right panel).

In a-c, the error bars indicate the s.e.m.; n = 9 from 3 tumours (3 fields/tumour); the data shown were analysed by using the Mann-Whitney U-test. NS, not significant.

### MDA-MB-231 + WT MEFs

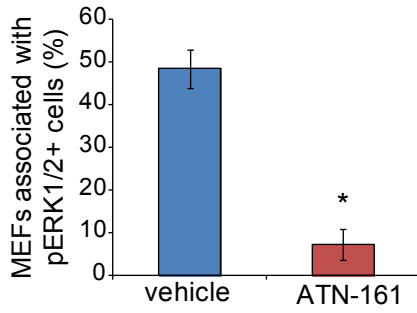

### Supplementary Figure 6. ATN-161 injection decreases the number of MEFs associated with phospho-ERK1/2 positive cells in tumour tissues of MDA-MB-231.

MDA-MB-231 cells were subcutaneously injected with WT MEFs into immunodeficient mice. At day 10 after tumour injection, mice were administered with vehicle or ATN-161 (2 mg/kg body weight) intraperitoneally, and tumour tissues were collected 4 h after injection followed by immunostaining analysis. The ratio of MEFs associated with phospho-ERK1/2 positive cells in tumour tissues was analysed. The error bars indicate the s.d.; n = 5 from 5 tumours (average of 5 fields/tumour); the data shown were analysed by using the Mann–Whitney U-test. \*p < 0.05.

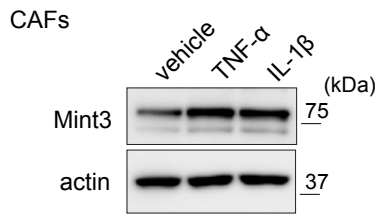

**Supplementary Figure 7. Inflammatory cytokines increase Mint3 expression in CAFs.**

CAFs were treated with vehicle, TNF- $\alpha$  (10 ng/mL), or IL-1 $\beta$  (10 ng/mL) for 24 h followed by western blot analysis.

The data are representative of 3 independent experiments with similar results.

MEFs

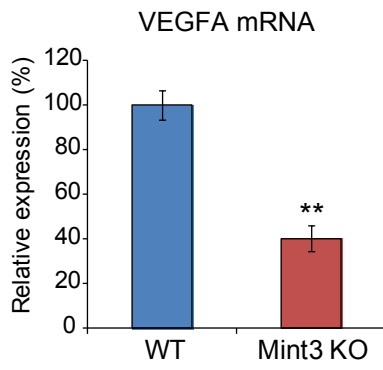

**Supplementary Figure 8. Mint3 depletion decreased VEGFA expression in MEFs.**

RT-qPCR analysis of VEGFA mRNA in WT and Mint3 KO MEFs. Error bars indicate the s.d. (n = 3).

The data were analysed by a t test. \*\*p < 0.05. The data are representative of 3 independent experiments with similar results.



**>2-fold genes (155)**

|               |           |
|---------------|-----------|
| 3830403N18Rik | Maf       |
| 4930432K21Rik | Mgat3     |
| 4930478M13Rik | Mtss1     |
| 6430553K19Rik | Neto2     |
| 6530409C15Rik | Ngef      |
| 6820445E23Rik | Notch3    |
| AA408650      | Npod      |
| Acot1         | Nr1h3     |
| Actn2         | Oas1a     |
| Adm2          | Oas1f     |
| Adssl1        | Ogdhl     |
| Afp           | Olfm1     |
| Amz1          | Olf1431   |
| Anxa8         | Ophn1     |
| Aqp1          | Parp10    |
| Arap3         | Pcdh12    |
| Arhgap9       | Pdcd1lg2  |
| Artn          | Pde2a     |
| Asphd2        | Pdgfb     |
| B4galnt1      | Pdgfra    |
| Bace2         | Pik3c2g   |
| BC061237      | Pip5k1l   |
| BC068157      | Pkp1      |
| C130030K03Rik | Plek2     |
| C1ql1         | Plekho2   |
| Cadm3         | Ptges     |
| Ccl17         | Ptk2b     |
| Cd276         | Ptpn18    |
| Cdc42ep5      | Ptpn5     |
| Cdsn          | Ptpre     |
| Cdyl2         | Qpct      |
| Ces1a         | Reep1     |
| Ces1g         | Rgs17     |
| Chma4         | Rhox3a    |
| Cpa2          | Rhox5     |
| Crabp1        | Rnf130    |
| Crip1         | Rnf183    |
| Ctf1          | Rnls      |
| Cx3cl1        | Sardh     |
| Cym           | Scara3    |
| D930026N18Rik | Serpina10 |
| Dlx4          | Serpinb9f |
| Dnah7a        | Sftpd     |
| Dnajc22       | Sgcd      |
| Dusp2         | Sh2d1b1   |
| Elavl2        | Slc16a3   |
| Enpp2         | Slc35g2   |
| Fam129a       | Slc7a2    |
| Fam19a5       | Slit3     |
| Fat4          | Slx       |
| Foxred2       | Smpd13b   |
| Gfpt2         | Sp110     |
| Gm10487       | Spn       |
| Gm10639       | Srgap3    |
| Gm12349       | Stac2     |
| Gm14625       | Synpo     |
| Gm14625       | Syt12     |
| Gm15085       | Tcf7      |
| Gm1993        | Tmem119   |
| Gm2030        | Trib2     |
| Gm3776        | Trim44    |
| Gm4297        | Trim46    |
| Gm5072        | Ucma      |
| Gm5168        | Ugt1a6b   |
| Gm9889        | Ulbp1     |
| Grem1         | Ulbp1     |
| Gsc           | Vmn1r124  |
| Hapln4        | Vmn1r132  |
| Hmx2          | Vmn2r96   |
| Htr7          | Vps13c    |
| Igfbp6        | Xdh       |
| Igsf10        | Xlr       |
| Irx3          | Zcwpw1    |
| Lama5         | Zfp296    |
| Lef1          | Zswim5    |
| Lmcd1         |           |
| LOC552912     |           |
| Lrg1          |           |
| Luzp4         |           |
| Maats1        |           |

**<0.5-fold genes (191)**

|               |              |          |
|---------------|--------------|----------|
| 1700017I07Rik | Gng13        | Slc24a4  |
| 3830406C13Rik | Gpr126       | Slc26a10 |
| 3830406C13Rik | Grhl1        | Slc35f2  |
| 4930402H24Rik | Gspt2        | Slc38a4  |
| 4930573O21Rik | Hal          | Slc6a15  |
| 5830416P10Rik | Hoxa1        | Snap91   |
| 9430014F16Rik | Hspa1a       | Snca     |
| 9630025H16Rik | Igsf5        | Speer4b  |
| A930028N01Rik | Il3ra        | Spint1   |
| Abcb9         | Irak3        | St3gal6  |
| Ablim1        | Jakmip2      | Stxbp5l  |
| Acap1         | Kcnf1        | Stxbp6   |
| Adam19        | Kcnf1        | Syce2    |
| Adamts13      | Klhl13       | Tbx20    |
| Adcy3         | Klhl32       | Tex19.1  |
| Ahrr          | Klk1b5       | Tll1     |
| Akip1         | Krt75        | Tmem141  |
| Aldh1a1       | Krtap1-4     | Tmem246  |
| Aldh1a7       | L1cam        | Trim71   |
| Aldh1b1       | Lca5l        | Tspan13  |
| Arhgap36      | Lce1i        | Tspan7   |
| As3mt         | Lct          | Tspsy15  |
| Asgr1         | Ldb2         | Ttbc1    |
| Atf7ip2       | Lin7a        | Ubash3a  |
| Atp2b2        | Lmo1         | Ubqln1   |
| Atp6v0a4      | LOC101055644 | Vat1l    |
| Avpr1a        | LOC101056168 | Wdr78    |
| AY074887      | Lonrf3       | Xk       |
| B4galnt4      | Lphn2        | Zfp169   |
| Bex1          | Lpl          | Zfp518a  |
| C530008M17Rik | Lrp2         | Zfp65    |
| Cd33          | Lypd4        |          |
| Cd6           | Lypd6        |          |
| Cdh13         | Macrod2      |          |
| Cdkn1c        | Mageh1       |          |
| Chd7          | Map2         |          |
| Chst10        | March1       |          |
| Cnn1          | Mark1        |          |
| Cnrip1        | Mid1         |          |
| Coch          | Mpz12        |          |
| Col2a1        | Msl3l2       |          |
| Creld1        | Msrb2        |          |
| Cspg4         | Myo5b        |          |
| Cst7          | Naa11        |          |
| Cth           | Ndn          |          |
| Cyp2ab1       | Nefm         |          |
| Dach1         | Olf173       |          |
| Dcn           | Olf1677      |          |
| Dlk1          | Olf1868      |          |
| Dync1i1       | Olf1969      |          |
| Dysf          | Parm1        |          |
| E2f6          | Pcdh17       |          |
| Eda           | Pdgfd        |          |
| Egln3         | Pdlim3       |          |
| Eif4g3        | Penk         |          |
| Elmod1        | Perp         |          |
| Eml2          | Pla2g2d      |          |
| Epas1         | Plac8        |          |
| Epha1         | Plac9a       |          |
| Erdr1         | Plagl1       |          |
| Etv3l         | Plxdc2       |          |
| Fabp12        | Polr1b       |          |
| Fam115c       | Pomc         |          |
| Fam131a       | Postn        |          |
| Fam73a        | Pr18a9       |          |
| Fam81b        | Ptprb        |          |
| Fbxl7         | Ptprz1       |          |
| Fgf14         | Rab38        |          |
| Fign          | Rbp4         |          |
| Frrs1l        | Renbp        |          |
| Gabra2        | Ret          |          |
| Gabra3        | Robo1        |          |
| Galnt3        | Rragb        |          |
| Gas6          | Rundc3b      |          |
| Ggn           | Scml2        |          |
| Glipr1        | Sema6d       |          |
| Gm10276       | Sfrp2        |          |
| Gm2795        | Sgsm1        |          |
| Gm6093        | Shroom2      |          |
| Gnai1         | Slc16a7      |          |

Supplementary Table 1. Lists of genes with &gt;2-fold and &lt;0.5-fold expression in Mint3 KO MEFs

**Primer sequences**

|                               |           |                              |
|-------------------------------|-----------|------------------------------|
| <i>Actb</i> ( $\beta$ -actin) | sense     | 5'-agatcaagatcattgctcctct-3' |
|                               | antisense | 5'-acgcagctcagtaacagtcc-3'   |
| <i>Hif1a</i>                  | sense     | 5'-catttctcagtcgacacagc-3'   |
|                               | antisense | 5'-tgtcctgtgggtgacttgcc-3'   |
| <i>L1cam</i>                  | sense     | 5'-caccctgaggcattacacct-3'   |
|                               | antisense | 5'-tgccagtgcagtagcagact-3'   |
| <i>Aqp1</i>                   | sense     | 5'-gctgtcatgtacatcatgccag-3' |
|                               | antisense | 5'-aggtcattgcgccaagtgaat-3'  |
| <i>Cx3cl1</i>                 | sense     | 5'-gccattgtcctggagacgac-3'   |
|                               | antisense | 5'-ccaaggtgatcccaggtgc-3'    |
| <i>Notch3</i>                 | sense     | 5'-ttctcctgtcgttctcctcg-3'   |
|                               | antisense | 5'-ggcactcatctatgtcacttgg-3' |
| <i>Pdgfb</i>                  | sense     | 5'-gactccgtagatgaagatgg-3'   |
|                               | antisense | 5'-ttgcactcggcgattacagc-3'   |
| <i>Slc16a3</i>                | sense     | 5'-tcacgggtttctctacgc-3'     |
|                               | antisense | 5'-gccaaagcggttcacacac-3'    |
| <i>Lpl</i>                    | sense     | 5'-ccaatggaggcacttccag-3'    |
|                               | antisense | 5'-ccacgtctccgagtcctctc-3'   |
| <i>Ptprb</i>                  | sense     | 5'-tctgcagacagaaagctagc-3'   |
|                               | antisense | 5'-tagaaggtagttggagtctg-3'   |
| <i>Vegfa</i>                  | sense     | 5'-agagcagaagtccatgaag-3'    |
|                               | antisense | 5'-ctggtagacatccatgaactg-3'  |

**shRNA sequences**

|           |                                                       |
|-----------|-------------------------------------------------------|
| shLacZ    | 5'-gcuacacaaaucagcgauuucgaaaaucgcugauuuguguag-3'      |
| shMint3#1 | 5'-gaugaugggcggugagcgggacgaaucccugaccaccgccauc-3'     |
| shMint3#2 | 5'-gcgguucuugguccuguaugacgaaucauacaggaccaagaaccgc-3'  |
| shL1CAM#1 | 5'-gcugcuuugccagcaauaagccgaagcuauuugcuggcaaacgagc-3'  |
| shL1CAM#2 | 5'-ggaugaacagcaagaucuuugccgaagcaagaucuuugcuguuaucc-3' |

**siRNA sequences**

|                                |                           |
|--------------------------------|---------------------------|
| control siRNA                  | 5'-gaucuacuggucugccuaa-3' |
| mouse HIF-1 $\alpha$ (#1)      | 5'-caagcaacugucauuaua-3'  |
| mouse HIF-1 $\alpha$ (#2)      | 5'-cuuugauguggauagcgau-3' |
| mouse FIH-1 (#1)               | 5'-ccauaaguucuuauacuau-3' |
| mouse FIH-1 (#2)               | 5'-guauugcaccgucgacuua-3' |
| mouse L1CAM (#1)               | 5'-caaugacacuggacgcua-3'  |
| mouse L1CAM (#2)               | 5'-caguaguucgccuugcaa-3'  |
| human integrin $\beta$ 1 (#1)  | 5'-cuguucuuuggauacuagu-3' |
| human integrin $\beta$ 1 (#2)  | 5'-cuuacucaaugaaagacga-3' |
| human integrin $\alpha$ 5 (#1) | 5'-cagauaacuucacccgaau-3' |
| human integrin $\alpha$ 5 (#2) | 5'-cacuuuccaugcccagaau-3' |
| human integrin $\alpha$ V (#1) | 5'-cuuuacugcugauagugcu-3' |
| human integrin $\alpha$ V (#2) | 5'-cacauugguuaccacuaau-3' |
| human MT1-MMP (#1)             | 5'-gguucuggcgggugaggaa-3' |
| human MT1-MMP (#2)             | 5'-gauggauaccaaugccca-3'  |
| human L1CAM (#1)               | 5'-cacacaaccugaccgaucu-3' |
| human L1CAM (#2)               | 5'-ccaagaucugacugcgga-3'  |

**Antibodies (Western blot)**

| antibody                                                                               | dilution |
|----------------------------------------------------------------------------------------|----------|
| anti-V5 mouse antibody (R960-25; Thermo Fisher Scientific)                             | 1:1000   |
| anti-actin mouse antibody (MAB1501; Merck Millipore)                                   | 1:1000   |
| anti-Erk1/2 rabbit antibody (#4695; Cell Signaling Technology,)                        | 1:1000   |
| anti-phospho-Erk1/2 (Thr202/Tyr204) rabbit antibody (#4370; Cell Signaling Technology) | 1:1000   |
| anti-integrin $\alpha$ 5 mouse antibody (51-9001996; BD Biosciences)                   | 1:1000   |
| anti-integrin $\alpha$ V rabbit antibody (ab124968; Abcam)                             | 1:500    |
| anti-integrin $\beta$ 1 mouse antibody (51-9001995; BD Biosciences)                    | 1:1000   |
| anti-Mint3 mouse antibody (611380; BD Biosciences)                                     | 1:1000   |
| anti-MT1-MMP mouse antibody (MAB3328; Merck Millipore)                                 | 1:1000   |
| anti-laminA/C mouse antibody (612162; BD Biosciences)                                  | 1:1000   |
| anti-HIF-1 $\alpha$ mouse antibody (H1alpha67; Abcam)                                  | 1:1000   |
| Anti-FLAG rabbit antibody (F7425; Sigma)                                               | 1:1000   |
| anti-L1CAM goat antibody (SC-1508; Santa Cruz Biotechnology)                           | 1:250    |
| anti-FIH-1 goat antibody (SC-26219; Santa Cruz Biotechnology)                          | 1:250    |

**Antibodies (immunostaining, cell)**

| Antibody                                                                                       | dilution |
|------------------------------------------------------------------------------------------------|----------|
| anti-V5 mouse antibody (R960-25; Thermo Fisher Scientific)                                     | 1:500    |
| anti-mouse IgG conjugated to Alexa Fluor 488 goat antibody (A-11029; Thermo Fisher Scientific) | 1: 2000  |

**Antibodies (immunostaining, frozen section)**

| Antibody                                                                                        | dilution |
|-------------------------------------------------------------------------------------------------|----------|
| rabbit anti-cleaved caspase-3 antibody (#9579; Cell Signaling Technology)                       | 1:100    |
| rabbit anti-Ki67 antibody (RM-9106-S0; Thermo Fisher Scientific)                                | 1:400    |
| mouse anti-SV40 large T antigen (ab16879; Abcam)                                                | 1:100    |
| rabbit anti-SV40 large T antigen (#15729; Cell Signaling Technology)                            | 1:200    |
| anti-phospho-Erk1/2 (Thr202/Tyr204) rabbit antibody (#4370; Cell Signaling Technology)          | 1:100    |
| anti-mouse IgG conjugated to Alexa Fluor 488 goat antibody (A-11029; Thermo Fisher Scientific)  | 1: 500   |
| anti-rabbit IgG conjugated to Alexa Fluor 546 goat antibody (A-11035; Thermo Fisher Scientific) | 1: 500   |

**Antibodies (immunostaining, paraffin section)**

| Antibody                                                                                                       | Antigen retrieval                                               | dilution |
|----------------------------------------------------------------------------------------------------------------|-----------------------------------------------------------------|----------|
| rabbit polyclonal antibody against L1CAM (ab123990; Abcam)                                                     | microwave (600 W, 10 min) using 10 mM citrate buffer (pH 6.0)   | 1:100    |
| mouse monoclonal antibody against MT1-MMP (MAB3328; Merck Millipore)                                           | microwave (600 W, 10 min) using 10 mM citrate buffer (pH 6.0)   | 1:500    |
| rabbit monoclonal antibody against anti-phospho-Erk1/2 (Thr202/Tyr204) (#4370 Cell 1:100 Signaling Technology) | microwave (600 W, 10 min) using 10 mM citrate buffer (pH 6.0)   | 1:100    |
| rabbit polyclonal antibody against APBA3/Mint3 (HPA045577; Sigma)                                              | microwave (600 W, 10 min) using 100 mM Tris-HCl buffer (pH 9.2) | 1:100    |

**Supplementary Table 2. Lists of detailed material information.**

| <b>Factors</b>              | <b>n(%)</b> |
|-----------------------------|-------------|
| <b>Average Age (Yr)</b>     | 58 (28-85)  |
| <b>Primary tumor</b>        |             |
| T1b                         | 13 (14.9%)  |
| T1c                         | 41 (47.1%)  |
| T2                          | 30 (34.5%)  |
| T3                          | 1 (1.1%)    |
| T4                          | 2 (2.3%)    |
| <b>Regional lymph nodes</b> |             |
| N0                          | 58 (66.7%)  |
| N1                          | 24 (27.6%)  |
| N2                          | 4 (4.6%)    |
| N3                          | 1 (1.1%)    |
| <b>p-Stage</b>              |             |
| IA                          | 42 (48.3%)  |
| IIA                         | 28 (32.2%)  |
| IIB                         | 10 (11.5%)  |
| IIIA                        | 5 (5.7%)    |
| IIIB                        | 1 (1.1%)    |
| IIIC                        | 1 (1.1%)    |

**Supplementary Table 3 Clinicopathological information from 87 patients with invasive breast cancer**
